# Supplementary material
Source: publisher site journal article supplement (https://www.spandidos-publications.com/5432/downloadSupplementary)

Figure S1. Frame illustration of vectors overexpression or knocking down MALT1. MALT1, mucosa-associated lymphoid tissue lymphoma translocation protein 1.

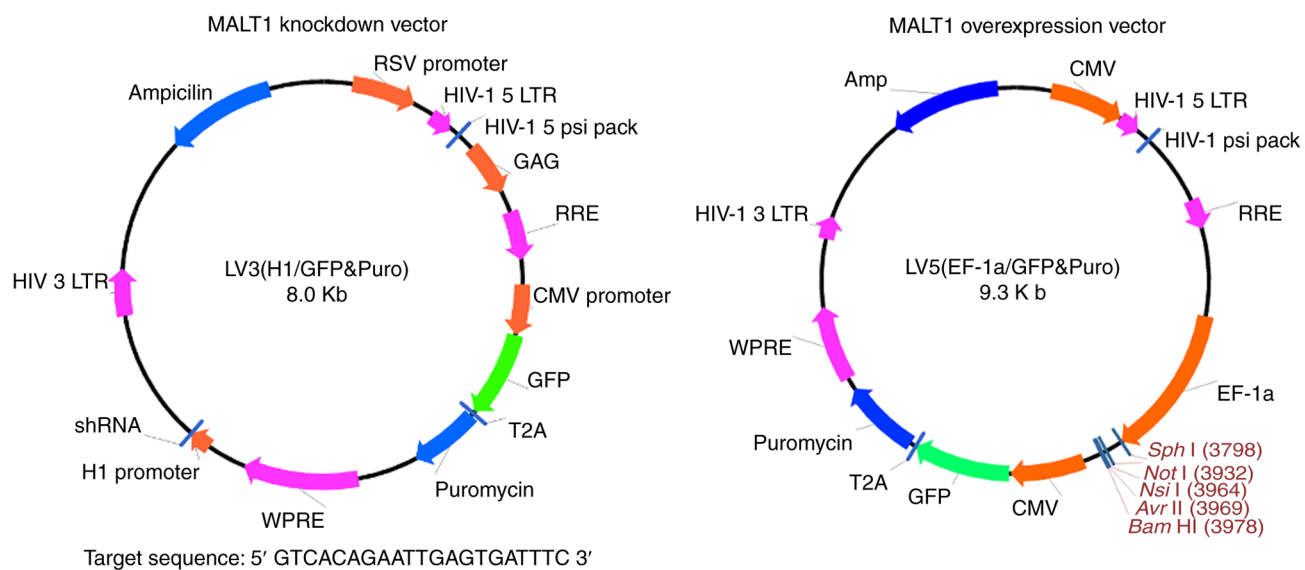

Supplement: Supplementary file 1 [file downloadSupplementary]
